# Supplementary material for: Fabrication and characterization of xanthan gum nanofibers reinforced with thiosemicarbazide: adsorption of Pb2+ from an aqueous medium
Source: PubMed Central journal article supplement — RSC Adv. 2024 Nov 27;14(51):37859–70. doi: 10.1039/d4ra06364c (PMC11600308; doi:10.1039/d4ra06364c), 2024-11-27
Supplement: RA-014-D4RA06364C-s001.pdf [file RA-014-D4RA06364C-s001.pdf]

## Fabrication and characterization of xanthan gum nanofibers reinforced with thiosemicarbazide: adsorption of $Pb^{2+}$ from aqueous medium

Reem Ghubayra<sup>a,b</sup>, Ibtisam Mousa<sup>a,b</sup>, Marwah M. M. Madkhali<sup>a,b</sup>, Abdel-Nasser M.A. Alaghaz<sup>a,b</sup>, Asaad F. Hassan<sup>\*c</sup>

<sup>a</sup> Department of Physical Sciences, Chemistry Division, College of Science, Jazan University, P.O. Box. 114, Jazan 45142, Kingdom of Saudi Arabia.

<sup>b</sup> Nanotechnology Research Unit, College of Science, Jazan University, P.O. Box. 114, Jazan 45142, Kingdom of Saudi Arabia.

<sup>c</sup> Department of Chemistry, Faculty of Science, Damanhour University, Egypt

\*Corresponding author: [asmz68@sci.dmu.edu.eg](mailto:asmz68@sci.dmu.edu.eg)

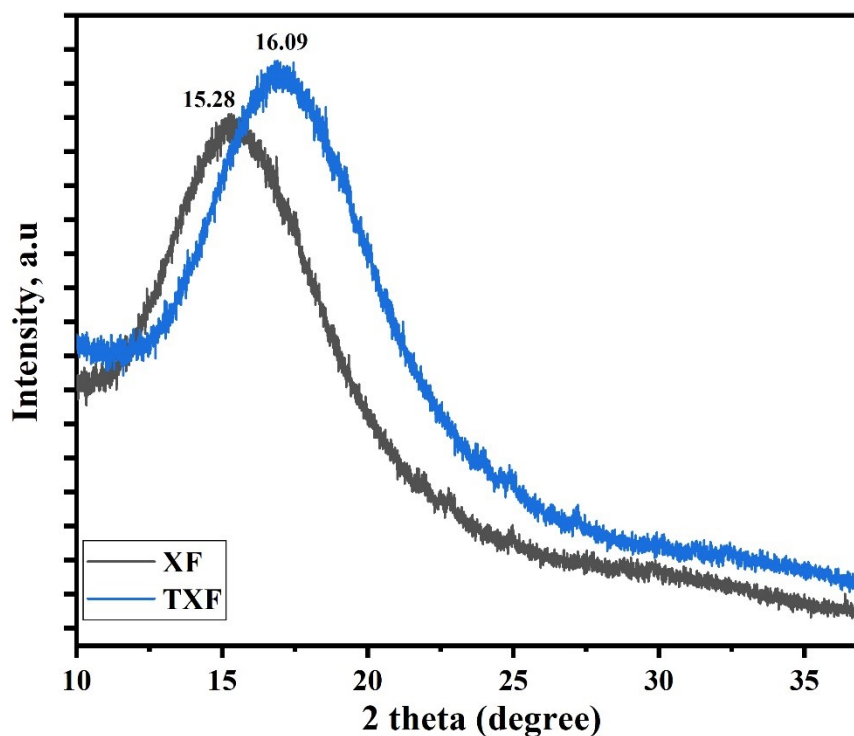

Fig. S1: X-ray diffraction patterns for XF and TXF.

## Mechanism of $\text{Pb}^{2+}$ adsorption onto XFT surface

The possible lead ions adsorption mechanism onto TXF nanofibers is shown in Fig. S2. The surface functional groups of the TXF composite, including C=S, -OH, O<sup>-</sup>, -NH, and COO<sup>-</sup> groups, interacted with  $\text{Pb}^{2+}$  through surface complexation and electrostatic interactions. Electrostatic attraction was the result of interactions between  $\text{Pb}^{2+}$  and the active functional groups on TXF surface.<sup>1</sup>

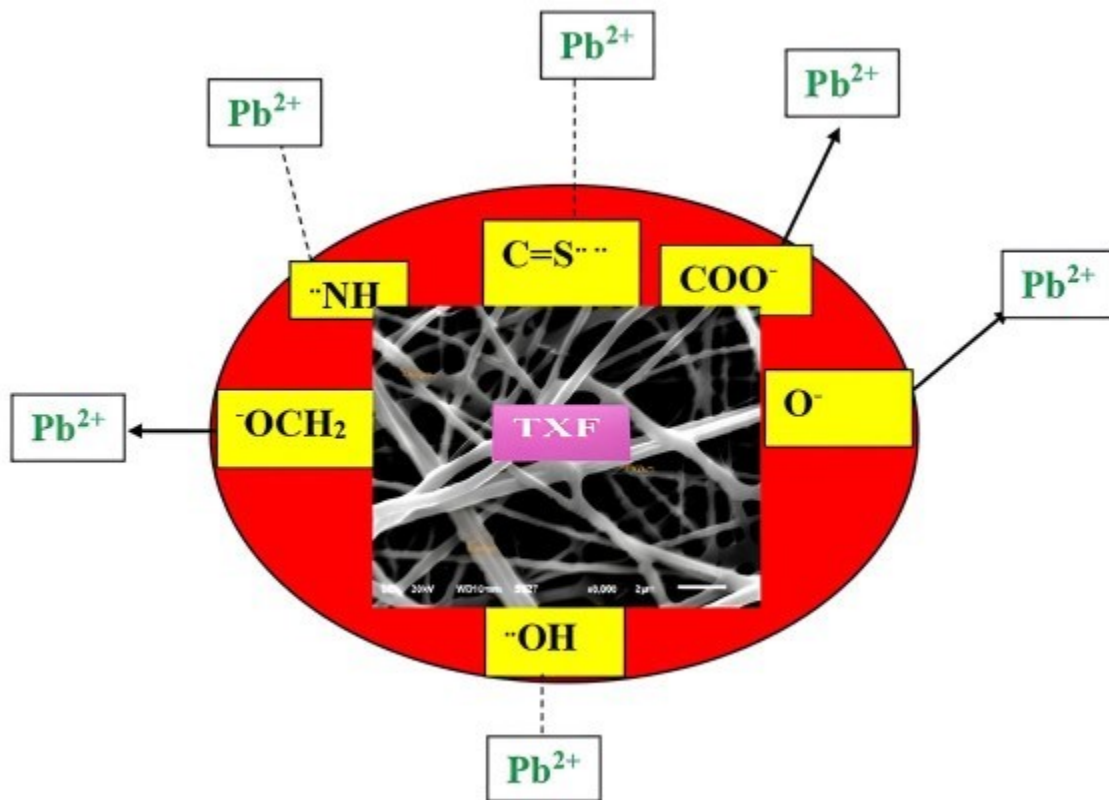

**Fig. S2:** Possible mechanism of  $\text{Pb}^{2+}$  adsorption onto TXF.

## References

- 1 H. Wang, S. Wang, S. Wang, L. Fu and L. Zhang, *J. Environ. Chem. Eng.*, 2023, 11, 109335.
